# Supplementary material
Source: publisher site journal article supplement (https://www.spandidos-publications.com/3873/downloadSupplementary)
Supplement: Supplementary file 2 [file downloadSupplementary]

## Sheet: Protein_Result
Table SIII. Raw data of the quantifiable proteins identified by parallel reaction monitoring validation.
Protein Accession	Gene Name	Non-VUR1 Relative Abundence	Non-VUR2 Relative Abundence	Non-VUR3 Relative Abundence	Non-VUR4 Relative Abundence	Non-VUR5 Relative Abundence	Non-VUR6 Relative Abundence	Non-VUR7 Relative Abundence	Non-VUR8 Relative Abundence	Non-VUR9 Relative Abundence	Non-VUR10 Relative Abundence	VUR1 Relative Abundence	VUR2 Relative Abundence	VUR3 Relative Abundence	VUR4 Relative Abundence	VUR5 Relative Abundence	VUR6 Relative Abundence	VUR7 Relative Abundence	VUR8 Relative Abundence	VUR9 Relative Abundence	VUR10 Relative Abundence	Non-VUR Relative Abundence	VUR Relative Abundence	VUR/Non-VUR Ratio	VUR/Non-VUR P-value	VUR/Non-VUR Ratio (TQ)
P04004	VTN	0.464648	0.0026832	0.721626	0.0754314	0.0167601	1.12627	0.146524	0.924285	1.01203	0.263544	2.30138	2.1824	0.641959	1.97149	0.96276	1.80777	0.212575	0.324778	2.47912	1.86443	0.47538	1.47487	3.1025	0.004739	2.85
O43451	MGAM	0.0619817	2.39409	2.59859	0.672036	2.06803	1.01819	0.624568	0.397613	0.250374	1.53474	2.07796	0.40854	0.753644	0.952009	0.948435	0.204188	0.245526	0.0356376	5.30137	1.49594	1.16202	1.24232	1.06911	0.890172	1.877
P98164	LRP2	0.00103314	1.54989	3.92506	1.27226	2.83325	1.33868	0.856567	0.238371	0.389405	0.640587	1.02886	0.0794542	0.794572	0.518172	0.15749	0.386909	1.66148	0.210928	2.81148	1.1363	1.30451	0.878564	0.673482	0.378185	2.325
Q13510	ASAH1	0.0164368	1.11715	4.42238	2.85454	2.08294	0.553728	0.26895	0.294487	0.035408	0.743585	0.789202	0.0984421	1.09625	0.36986	0.66314	0.0860694	0.421483	0.0510349	3.64321	0.850872	1.23896	0.806956	0.651317	0.456837	2.586
Q9UBR2	CTSZ	0	0.986571	2.58415	3.04636	0.685562	0.346979	1.94225	0.580321	0.703814	0.610732	1.02241	0.00680703	1.4533	0.526617	0.581325	0.355306	0.729616	0.128395	1.08668	0.49924	1.14867	0.63897	0.556267	0.163881	2.71
P02452	COL1A1	0.118525	0.0665118	0.69293	0.0599539	0.211861	0.748385	0.513934	0.843997	1.0006	0.187626	0	1.22529	0.925617	1.06281	1.24534	5.6571	0.705438	0.96072	2.17166	1.4084	0.444432	1.53624	3.45663	0.0431866	5.641
O00159	MYO1C	0.157169	1.66046	0.877137	0.566088	1.09259	2.99493	0.413047	0.348707	0.090126	3.40378	4.30097	0.29207	0.0643377	1.10705	3.43111	0.00137934	0.0214844	0.00294392	1.93792	0.869345	1.1604	1.20286	1.03659	0.945757	0.487
P80723	BASP1	0.00261802	0.169762	0.48376	1.52418	0.183434	3.25027	0.609028	1.37507	0.222351	4.99363	2.1936	1.7741	3.29607	0.309796	0.0300479	0.263632	1.06864	0.31518	0.630021	0.992872	1.28141	1.0874	0.848593	0.7552	0.209
Q9UJU6	DBNL	0	1.67133	0.9507	0.862984	1.23986	2.55327	0.513421	0.26874	0.21059	1.32553	2.88299	0.0289217	0.68986	1.2921	2.59369	0.495968	0.488223	0.371812	2.20044	0.455007	0.959642	1.1499	1.19826	0.647434	0.218
Q14624	ITIH4	0.0218993	1.50788	2.26818	2.0575	1.60245	1.73378	0.188091	0.878843	0.6027	0.958659	1.23486	0.00266449	1.7479	0.489186	0.228045	0.231298	1.45943	0.352973	4.29304	1.20117	1.182	1.12406	0.95098	0.902964	6.063
P00338	LDHA	0.00219776	0.753166	0.534365	0.8907	0.642863	3.73023	7.12002	0.837607	0.436639	2.23602	1.06192	0.0154352	0.747837	0.270498	0.260713	0.136733	0.225798	0.134455	1.61709	1.17009	1.71838	0.564057	0.328249	0.122834	0.246
O96013	PAK4	0.0375843	1.71366	1.795	1.13047	1.31257	3.03006	0.217133	0.517481	0.284919	2.28693	2.57559	0.0871873	0.686333	0.398865	1.12467	0.121154	0.212274	0.0533905	3.01624	1.25186	1.23258	0.952756	0.772977	0.549728	0.286
O75340	PDCD6	0.219439	1.30665	2.46422	1.75914	0.934275	2.64864	0.344721	0.682845	0.602535	1.47654	0.583524	3.0785e-05	0.791401	0.886054	1.10172	0.0250068	0.205252	0.0123357	3.83465	1.1113	1.2439	0.855127	0.687456	0.397417	0.297
Q8TF74	WIPF2	0.00985241	1.48659	1.6151	1.63883	2.80951	1.6123	0.167952	0.410011	0.184006	1.19347	1.94982	0.292086	0.938474	1.03767	1.51985	0.300378	0.84957	0.280281	2.80854	0.663524	1.11276	1.06402	0.956196	0.900586	0.334
VUR, vesicoureteral reflux; BASP1, brain acid soluble protein 1; COL1A1, α-1 type I collagen; VTN, vitronectin; LRP2, low density lipoprotein-related protein 2; WIPF2, WAS/WASL interacting protein family member 2; CTSZ, cathepsin Z; MGAM, maltase-glucoamylase; MYO1C, unconventional myosin-Ic; LDHA, L-lactate dehydrogenase A chain; PDCD6, Programmed cell death protein 6; DBNL, Drebrin-like protein…
